# Supplementary material
Source: PubMed Central journal article supplement (PMC5692596)
Supplement: pnas.1714422114.sd01.pdf [file pnas.1714422114.sd01.pdf]

## Dataset S1. SDX differentially expressed TFs

| Gene model ID (v3) | Gene model ID (v2) | Assigned name | TF family   | Normalized reads (Count per million, CPM) |        |        |       |
|--------------------|--------------------|---------------|-------------|-------------------------------------------|--------|--------|-------|
|                    |                    |               |             | Xylem                                     | Phloem | Leaves | Shoot |
| Potri.001G055900   | POPTR_0001s13890   |               | SBP         | 29.36                                     | 16.15  | 7.42   | 17.01 |
| Potri.001G057800   | POPTR_0001s13700   |               | CAMTA       | 34.49                                     | 19.96  | 19.24  | 16.67 |
| Potri.001G092900   | POPTR_0001s10490   |               | WRKY        | 4.77                                      | 1.74   | 1.67   | 1.93  |
| Potri.001G099800   | POPTR_0001s09810   | MYB010        | MYB         | 157.90                                    | 2.74   | 0.46   | 0.51  |
| Potri.001G112200   | POPTR_0001s08550   |               | TALE        | 197.34                                    | 6.18   | 43.75  | 5.78  |
| Potri.001G118800   | POPTR_0001s07830   | MYB092        | MYB         | 111.32                                    | 1.42   | 0.68   | 1.20  |
| Potri.001G120000   | POPTR_0001s00220   | VND6-B2       | NAC         | 5.66                                      | 0.49   | 2.23   | 1.32  |
| Potri.001G121300   | POPTR_0001s00350   |               | WRKY        | 7.01                                      | 0.07   | 0.70   | 0.00  |
| Potri.001G139900   | POPTR_0001s02240   | MYB149        | MYB         | 3.55                                      | 1.13   | 0.08   | 0.05  |
| Potri.001G150600   | POPTR_0001s15070   |               | Trihelix    | 22.95                                     | 5.44   | 13.17  | 10.95 |
| Potri.001G157700   | POPTR_0001s15790   |               | C2H2        | 14.52                                     | 4.53   | 3.17   | 5.82  |
| Potri.001G188800   | POPTR_0001s18930   |               | HD-ZIP      | 443.67                                    | 103.21 | 26.82  | 79.01 |
| Potri.001G235500   | POPTR_0001s24220   |               | MYB         | 40.26                                     | 0.91   | 0.94   | 0.42  |
| Potri.001G241600   | POPTR_0001s24840   |               | MYB_related | 23.73                                     | 8.17   | 8.35   | 13.03 |
| Potri.001G258400   | POPTR_0001s26560   |               | C3H         | 12.71                                     | 1.10   | 0.20   | 0.10  |
| Potri.001G258700   | POPTR_0001s26590   | MYB002        | MYB         | 13.29                                     | 0.17   | 1.10   | 0.54  |
| Potri.001G267300   | POPTR_0001s27430   | MYB003        | MYB         | 13.52                                     | 0.50   | 0.47   | 0.31  |
| Potri.001G268200   |                    |               | C3H         | 27.95                                     | 13.27  | 11.02  | 9.97  |
| Potri.001G276800   | POPTR_0001s28350   |               | HB-other    | 17.65                                     | 10.70  | 8.77   | 8.46  |
| Potri.001G292700   | POPTR_0001s30000   |               | MYB_related | 38.75                                     | 22.10  | 12.52  | 17.42 |
| Potri.001G361600   | POPTR_0001s37260   |               | WRKY        | 71.54                                     | 31.31  | 22.16  | 22.53 |
| Potri.001G372300   | POPTR_0001s38120   |               | HD-ZIP      | 227.76                                    | 96.26  | 41.44  | 67.17 |
| Potri.001G404400   | POPTR_0001s41490   | PNAC101       | NAC         | 9.61                                      | 0.43   | 0.04   | 0.40  |
| Potri.001G410600   | POPTR_0001s43950   |               | bHLH        | 7.96                                      | 0.09   | 1.19   | 3.67  |
| Potri.001G448400   | POPTR_0001s45250   | SND1_A2       | NAC         | 125.73                                    | 10.49  | 1.29   | 2.45  |
| Potri.001G472800   | POPTR_0001s47670   |               | WRKY        | 267.83                                    | 44.84  | 18.66  | 19.95 |
| Potri.002G008800   | POPTR_0002s00980   | WOX13         | WOX         | 320.90                                    | 17.32  | 7.20   | 6.86  |
| Potri.002G024700   | POPTR_0002s02630   |               | ARF         | 37.42                                     | 8.92   | 4.80   | 5.55  |
| Potri.002G031000   | POPTR_0002s03240   |               | TALE        | 61.32                                     | 1.39   | 1.27   | 1.48  |
| Potri.002G041700   | POPTR_0002s04260   |               | C2H2        | 5.29                                      | 0.07   | 0.00   | 0.09  |
| Potri.002G045800   | POPTR_0002s04660   |               | bZIP        | 25.07                                     | 14.98  | 10.93  | 12.29 |
| Potri.002G073400   | POPTR_0002s07430   |               | GRAS        | 64.53                                     | 26.46  | 17.66  | 13.87 |
| Potri.002G073500   | POPTR_0002s07440   | MYB189        | MYB         | 20.17                                     | 0.41   | 0.00   | 0.00  |
| Potri.002G096800   | POPTR_0002s09720   | MYB109        | MYB         | 8.88                                      | 0.61   | 0.33   | 0.10  |
| Potri.002G113400   | POPTR_0002s11410   |               | HD-ZIP      | 37.88                                     | 15.71  | 0.32   | 8.45  |
| Potri.002G124000   | POPTR_0002s12550   |               | ERF         | 3.03                                      | 0.60   | 0.23   | 0.27  |
| Potri.002G138900   | POPTR_0002s13980   |               | WRKY        | 56.57                                     | 0.26   | 0.07   | 0.28  |

|                  |                  |           |             |        |       |       |       |
|------------------|------------------|-----------|-------------|--------|-------|-------|-------|
| Potri.002G149000 | POPTR_0002s15000 |           | LBD         | 11.40  | 0.24  | 2.13  | 0.92  |
| Potri.002G168900 | POPTR_0002s17030 |           | MYB_related | 27.88  | 4.70  | 11.38 | 10.96 |
| Potri.002G178700 | POPTR_0002s17950 | SND1_B2   | NAC         | 19.82  | 5.80  | 0.68  | 0.84  |
| Potri.002G195300 | POPTR_0002s19630 |           | WRKY        | 30.77  | 11.51 | 9.77  | 3.43  |
| Potri.002G214500 |                  |           | CO-like     | 53.58  | 23.74 | 5.89  | 8.31  |
| Potri.002G235400 | POPTR_0002s23650 |           | bHLH        | 38.91  | 14.18 | 14.25 | 6.30  |
| Potri.002G239300 | POPTR_0002s24030 |           | FAR1        | 11.66  | 5.24  | 5.54  | 3.42  |
| Potri.002G239400 | POPTR_0002s24040 |           | FAR1        | 33.38  | 10.59 | 9.54  | 9.78  |
| Potri.002G246100 | POPTR_0002s24750 |           | ERF         | 61.65  | 9.35  | 34.03 | 15.46 |
| Potri.002G248500 | POPTR_0002s24990 |           | bHLH        | 62.46  | 29.21 | 2.28  | 4.99  |
| Potri.002G257800 | POPTR_0002s25960 |           | G2-like     | 49.10  | 17.29 | 14.77 | 14.98 |
| Potri.003G050100 | POPTR_0003s04860 |           | HD-ZIP      | 234.66 | 69.98 | 15.45 | 58.39 |
| Potri.003G065400 | POPTR_0003s06380 |           | GRAS        | 9.00   | 0.19  | 0.19  | 0.22  |
| Potri.003G077200 | POPTR_0003s07490 |           | C2H2        | 19.93  | 9.10  | 8.57  | 10.25 |
| Potri.003G083800 | POPTR_0003s08210 |           | Trihelix    | 16.41  | 6.58  | 5.70  | 5.39  |
| Potri.003G087700 | POPTR_0003s08600 |           | ARR-B       | 35.43  | 10.60 | 7.36  | 20.46 |
| Potri.003G090300 | POPTR_0003s08890 |           | LSD         | 84.83  | 13.15 | 22.40 | 36.80 |
| Potri.003G097600 | POPTR_0003s09630 |           | bZIP        | 32.42  | 16.78 | 19.38 | 17.61 |
| Potri.003G100800 | POPTR_0003s10000 |           | GRF         | 12.18  | 1.42  | 3.16  | 6.39  |
| Potri.003G113000 | POPTR_0003s11250 | VND6-B1   | NAC         | 22.30  | 1.13  | 2.77  | 1.82  |
| Potri.003G114100 | POPTR_0003s11360 | MYB125    | MYB         | 94.87  | 2.29  | 0.51  | 1.05  |
| Potri.003G121200 | POPTR_0003s12120 |           | ERF         | 0.35   | 0.02  | 0.03  | 0.00  |
| Potri.003G132000 | POPTR_0003s13190 | MYB128    | MYB         | 224.87 | 4.84  | 0.32  | 1.12  |
| Potri.003G142100 | POPTR_0003s14200 |           | ARF         | 53.00  | 27.89 | 21.49 | 14.72 |
| Potri.003G147200 |                  |           | HD-ZIP      | 0.90   | 0.05  | 0.09  | 0.09  |
| Potri.003G167900 | POPTR_0003s16630 |           | TCP         | 25.61  | 7.58  | 13.08 | 5.27  |
| Potri.003G195300 | POPTR_0003s19470 |           | Trihelix    | 130.13 | 64.36 | 6.88  | 28.19 |
| Potri.003G204400 | POPTR_0003s20320 |           | bZIP        | 34.78  | 11.04 | 15.31 | 6.16  |
| Potri.003G212500 |                  |           | MYB_related | 21.13  | 2.25  | 1.76  | 2.09  |
| Potri.004G048700 | POPTR_0004s04840 |           | HB-other    | 35.39  | 10.55 | 17.65 | 16.93 |
| Potri.004G049300 | POPTR_0004s04900 | SND2/3-A1 | NAC         | 39.71  | 2.15  | 3.49  | 2.99  |
| Potri.004G050200 | POPTR_0004s04970 |           | ARF         | 226.46 | 49.93 | 12.07 | 34.12 |
| Potri.004G071600 | POPTR_0004s06870 |           | GRAS        | 16.72  | 7.38  | 3.47  | 6.92  |
| Potri.004G078800 | POPTR_0004s07700 |           | GRAS        | 79.94  | 22.66 | 16.78 | 19.01 |
| Potri.004G086300 | POPTR_0004s08480 | MYB018    | MYB         | 6.11   | 1.12  | 1.65  | 2.29  |
| Potri.004G095100 | POPTR_0004s09420 |           | C3H         | 119.28 | 4.23  | 0.61  | 0.68  |
| Potri.004G118100 | POPTR_0004s11730 |           | C2H2        | 6.14   | 0.31  | 0.43  | 0.35  |
| Potri.004G159300 | POPTR_0004s16660 |           | TALE        | 124.77 | 28.32 | 15.92 | 25.65 |
| Potri.004G161000 |                  |           | DBB         | 6.94   | 0.43  | 0.72  | 0.24  |
| Potri.004G203400 | POPTR_0004s21360 |           | bZIP        | 63.84  | 20.90 | 3.06  | 1.81  |
| Potri.004G211800 | POPTR_0004s22140 |           | GATA        | 74.60  | 19.68 | 34.64 | 23.08 |

|                  |                  |            |             |        |       |       |       |
|------------------|------------------|------------|-------------|--------|-------|-------|-------|
| Potri.005G001600 | POPTR_0005s00340 | MYB170     | MYB         | 67.86  | 33.36 | 5.61  | 12.21 |
| Potri.005G029000 | POPTR_0005s02870 |            | MYB_related | 12.91  | 4.53  | 5.65  | 5.28  |
| Potri.005G053500 | POPTR_0005s05500 |            | bHLH        | 28.70  | 1.61  | 2.19  | 2.23  |
| Potri.005G063200 | POPTR_0005s06410 | MYB026     | MYB         | 45.13  | 0.92  | 0.06  | 0.08  |
| Potri.005G086400 | POPTR_0005s08860 |            | WRKY        | 38.61  | 12.53 | 2.35  | 9.63  |
| Potri.005G096600 | POPTR_0005s09930 | MYB028     | MYB         | 4.63   | 1.72  | 0.23  | 0.00  |
| Potri.005G101000 | POPTR_0005s10400 |            | Nin-like    | 5.78   | 1.36  | 2.13  | 1.24  |
| Potri.005G114700 | POPTR_0005s11680 |            | WOX         | 1.47   | 0.12  | 0.09  | 0.11  |
| Potri.005G116800 | POPTR_0005s11870 | VND6-C2    | NAC         | 15.75  | 0.40  | 3.36  | 1.54  |
| Potri.005G134900 | POPTR_0005s14150 |            | LBD         | 3.17   | 0.00  | 0.04  | 0.10  |
| Potri.005G171300 | POPTR_0005s16320 |            | ARF         | 12.01  | 3.16  | 5.69  | 7.08  |
| Potri.005G182900 | POPTR_0005s20550 |            | C3H         | 15.30  | 2.55  | 3.67  | 3.61  |
| Potri.005G186400 | POPTR_0005s20870 | MYB158     | MYB         | 18.79  | 0.28  | 0.07  | 0.07  |
| Potri.005G217800 | POPTR_0005s23930 |            | bHLH        | 87.76  | 38.73 | 18.43 | 28.10 |
| Potri.005G221400 | POPTR_0005s24280 |            | C2H2        | 2.03   | 0.00  | 0.00  | 0.03  |
| Potri.005G243400 | POPTR_0005s26480 |            | bZIP        | 21.20  | 6.65  | 0.30  | 6.33  |
| Potri.006G049200 | POPTR_0006s04770 |            | HSF         | 49.83  | 1.56  | 0.57  | 4.68  |
| Potri.006G049700 | POPTR_0006s04820 |            | AP2         | 51.06  | 12.60 | 3.06  | 15.92 |
| Potri.006G053500 | POPTR_0006s05210 |            | NF-YA       | 3.89   | 1.38  | 0.18  | 0.35  |
| Potri.006G075500 | POPTR_0006s07520 |            | HB-PHD      | 11.74  | 4.22  | 3.78  | 4.39  |
| Potri.006G108300 | POPTR_0006s10880 |            | B3          | 67.77  | 8.85  | 10.15 | 9.28  |
| Potri.006G115200 | POPTR_0006s11630 |            | GRF         | 11.28  | 0.31  | 0.53  | 2.65  |
| Potri.006G152700 | POPTR_0006s15740 | SND2/3-L-1 | NAC         | 57.44  | 8.43  | 4.47  | 3.42  |
| Potri.006G184800 |                  |            | WRKY        | 17.40  | 9.46  | 6.42  | 4.65  |
| Potri.006G201900 | POPTR_0006s21640 |            | NF-YA       | 34.58  | 4.37  | 6.64  | 1.30  |
| Potri.006G226800 | POPTR_0006s24330 |            | HSF         | 20.04  | 5.76  | 7.90  | 6.48  |
| Potri.006G237700 | POPTR_0006s25410 |            | GATA        | 15.17  | 3.77  | 3.64  | 3.75  |
| Potri.007G008200 | POPTR_0007s14590 |            | HD-ZIP      | 52.99  | 21.66 | 9.80  | 26.05 |
| Potri.007G014400 | POPTR_0007s13910 | VND6-C1    | NAC         | 111.49 | 1.91  | 3.21  | 1.99  |
| Potri.007G016000 |                  |            | C3H         | 28.11  | 5.52  | 12.94 | 11.01 |
| Potri.007G032700 | POPTR_0007s12170 |            | TALE        | 126.06 | 1.82  | 55.34 | 0.82  |
| Potri.007G039500 | POPTR_0007s11460 |            | LBD         | 10.98  | 0.19  | 0.12  | 0.07  |
| Potri.007G078200 | POPTR_0007s06930 |            | WRKY        | 20.42  | 11.17 | 2.60  | 6.60  |
| Potri.007G097600 | POPTR_0007s04950 |            | bHLH        | 13.96  | 3.80  | 0.12  | 2.12  |
| Potri.007G106100 | POPTR_0007s04140 | MYB031     | MYB         | 97.11  | 1.78  | 0.17  | 0.34  |
| Potri.007G134500 | POPTR_0007s01430 | MYB161     | MYB         | 16.89  | 0.97  | 0.18  | 0.19  |
| Potri.007G135300 | POPTR_0007s01350 | SND2/3-B1  | NAC         | 206.65 | 7.39  | 3.73  | 3.78  |
| Potri.007G135500 | POPTR_0007s01330 |            | HB-other    | 29.82  | 8.17  | 13.43 | 12.43 |
| Potri.008G018400 | POPTR_0008s01930 |            | bZIP        | 53.80  | 5.81  | 4.14  | 1.81  |
| Potri.008G027000 | POPTR_0008s02730 |            | Trihelix    | 13.94  | 6.84  | 6.55  | 6.32  |
| Potri.008G086000 | POPTR_0008s08560 |            | ZF-HD       | 1.38   | 0.00  | 0.11  | 0.47  |

|                  |                  |           |             |        |       |       |       |
|------------------|------------------|-----------|-------------|--------|-------|-------|-------|
| Potri.008G117500 | POPTR_0008s11630 |           | G2-like     | 17.28  | 1.03  | 1.27  | 0.24  |
| Potri.008G140200 | POPTR_0008s13960 |           | BBR-BPC     | 42.20  | 24.12 | 17.25 | 20.32 |
| Potri.008G179700 | POPTR_0008s17980 |           | Trihelix    | 34.75  | 15.18 | 16.10 | 12.18 |
| Potri.008G197000 | POPTR_0008s20160 |           | SBP         | 306.85 | 21.21 | 23.99 | 22.36 |
| Potri.009G014800 | POPTR_0009s02020 |           | ARF         | 20.78  | 4.82  | 7.39  | 11.82 |
| Potri.009G018500 | POPTR_0009s02360 |           | bZIP        | 16.71  | 6.94  | 6.50  | 4.98  |
| Potri.009G027300 | POPTR_0009s03240 | MYB023    | MYB         | 61.33  | 5.23  | 5.69  | 2.17  |
| Potri.009G035000 | POPTR_0009s03990 |           | G2-like     | 6.16   | 2.40  | 2.58  | 2.01  |
| Potri.009G045900 | POPTR_0009s05050 |           | M-type      | 3.17   | 0.02  | 0.01  | 0.00  |
| Potri.009G053900 | POPTR_0009s05860 | MYB021    | MYB         | 56.89  | 2.01  | 1.40  | 0.93  |
| Potri.009G060600 | POPTR_0009s06540 |           | NF-YA       | 82.75  | 28.89 | 26.65 | 6.36  |
| Potri.009G061500 | POPTR_0009s06630 | MYB020    | MYB         | 4.22   | 1.06  | 1.12  | 0.81  |
| Potri.009G062600 | POPTR_0009s06730 |           | C3H         | 18.23  | 9.20  | 8.25  | 6.58  |
| Potri.009G084100 | POPTR_0009s08740 |           | M-type      | 1.98   | 0.69  | 0.00  | 0.00  |
| Potri.009G120800 | POPTR_0009s12360 |           | TALE        | 131.80 | 38.49 | 26.67 | 24.94 |
| Potri.009G161900 | POPTR_0009s16350 |           | E2F/DP      | 10.57  | 5.21  | 5.31  | 4.87  |
| Potri.009G164300 | POPTR_0009s16590 |           | bZIP        | 17.61  | 4.94  | 0.24  | 0.84  |
| Potri.010G004300 |                  |           | MYB         | 39.62  | 4.19  | 1.16  | 1.62  |
| Potri.010G020900 |                  |           | MYB_related | 13.56  | 6.44  | 6.80  | 5.95  |
| Potri.010G118700 | POPTR_0010s12860 |           | C3H         | 18.96  | 0.60  | 0.03  | 0.18  |
| Potri.010G128900 | POPTR_0010s13900 |           | G2-like     | 12.62  | 2.73  | 1.28  | 0.83  |
| Potri.010G130000 | POPTR_0010s14010 |           | bHLH        | 59.91  | 12.06 | 10.49 | 7.66  |
| Potri.010G135200 | POPTR_0010s14530 |           | bZIP        | 12.65  | 0.19  | 0.46  | 4.98  |
| Potri.010G154100 | POPTR_0010s16380 |           | MIKC        | 4.89   | 0.14  | 0.10  | 0.03  |
| Potri.010G188700 | POPTR_0010s19600 |           | NF-X1       | 31.32  | 8.37  | 12.71 | 10.52 |
| Potri.010G209400 | POPTR_0010s21650 |           | C2H2        | 15.60  | 0.58  | 0.25  | 0.29  |
| Potri.010G216200 | POPTR_0010s22320 |           | AP2         | 75.66  | 5.46  | 3.07  | 3.67  |
| Potri.010G223300 | POPTR_0010s23010 |           | GATA        | 98.24  | 17.29 | 54.15 | 33.91 |
| Potri.010G233500 | POPTR_0010s23970 |           | Trihelix    | 19.30  | 5.88  | 7.20  | 4.93  |
| Potri.011G043600 |                  |           | B3          | 19.24  | 5.56  | 3.46  | 3.87  |
| Potri.011G058400 | POPTR_0011s05740 | SND2/3-A2 | NAC         | 57.80  | 2.37  | 2.71  | 2.80  |
| Potri.011G058600 | POPTR_0011s05760 | PNAC102   | NAC         | 0.50   | 0.07  | 0.00  | 0.00  |
| Potri.011G061800 | POPTR_0011s06020 |           | ERF         | 0.30   | 0.02  | 0.00  | 0.00  |
| Potri.011G065500 |                  |           | bHLH        | 3.63   | 0.05  | 0.40  | 0.20  |
| Potri.011G087900 | POPTR_0011s09030 |           | WRKY        | 19.99  | 8.73  | 4.38  | 3.57  |
| Potri.011G098300 | POPTR_0011s10070 |           | HD-ZIP      | 112.73 | 59.19 | 22.16 | 35.79 |
| Potri.011G153300 | POPTR_0011s15640 | SND1_A1   | NAC         | 150.31 | 14.48 | 1.44  | 2.98  |
| Potri.011G169300 | POPTR_0011s17230 |           | WRKY        | 33.15  | 18.53 | 16.63 | 14.88 |
| Potri.012G023900 | POPTR_0012s03100 | PNAC140   | NAC         | 0.88   | 0.05  | 0.05  | 0.00  |
| Potri.012G039400 | POPTR_0012s03650 | MYB167    | MYB         | 24.27  | 0.15  | 0.13  | 0.17  |
| Potri.012G084100 | POPTR_0012s08600 | MYB148    | MYB         | 14.12  | 2.82  | 2.43  | 1.65  |

|                  |                  |           |             |        |       |       |       |
|------------------|------------------|-----------|-------------|--------|-------|-------|-------|
| Potri.012G100700 | POPTR_0012s10260 |           | SBP         | 33.29  | 14.63 | 0.89  | 15.02 |
| Potri.012G106100 | POPTR_0012s10790 |           | ARF         | 180.38 | 95.69 | 69.79 | 58.31 |
| Potri.012G126500 | POPTR_0012s14660 | VND6-A2   | NAC         | 15.59  | 0.26  | 1.71  | 0.94  |
| Potri.012G127700 | POPTR_0012s14540 | MYB199    | MYB         | 211.29 | 16.74 | 5.09  | 16.14 |
| Potri.012G134800 | POPTR_0012s13800 |           | C3H         | 34.59  | 17.01 | 16.36 | 16.49 |
| Potri.013G041000 |                  |           | bHLH        | 42.42  | 0.31  | 0.39  | 1.70  |
| Potri.013G056700 | POPTR_0013s05330 |           | ERF         | 3.00   | 0.19  | 0.49  | 0.28  |
| Potri.013G081200 | POPTR_0013s08040 |           | LBD         | 23.05  | 0.05  | 5.46  | 4.84  |
| Potri.013G109300 | POPTR_0013s11360 | MYB180    | MYB         | 44.99  | 15.22 | 11.67 | 29.19 |
| Potri.013G114900 | POPTR_0013s11930 |           | GRAS        | 14.61  | 3.03  | 0.23  | 0.85  |
| Potri.013G123100 | POPTR_0013s12690 |           | VOZ         | 10.38  | 6.04  | 3.42  | 3.82  |
| Potri.013G126800 | POPTR_0013s13050 |           | bHLH        | 25.43  | 12.01 | 3.87  | 10.53 |
| Potri.013G149100 | POPTR_0013s14550 | MYB048    | MYB         | 1.23   | 0.02  | 0.19  | 0.00  |
| Potri.013G156200 | POPTR_0013s15220 |           | LBD         | 49.07  | 0.19  | 0.68  | 0.62  |
| Potri.013G156900 | POPTR_0013s15280 |           | bZIP        | 29.89  | 15.16 | 15.95 | 18.35 |
| Potri.014G004900 | POPTR_0014s01010 |           | MYB_related | 23.08  | 12.30 | 7.64  | 7.45  |
| Potri.014G050000 | POPTR_0014s04890 |           | WRKY        | 69.80  | 0.84  | 1.66  | 14.74 |
| Potri.014G066100 | POPTR_0014s06150 |           | C2H2        | 27.56  | 3.84  | 1.39  | 1.94  |
| Potri.014G070400 | POPTR_0014s06600 |           | LBD         | 7.40   | 0.07  | 2.71  | 3.05  |
| Potri.014G076000 | POPTR_0014s07210 | PNAC030   | NAC         | 3.94   | 0.37  | 0.00  | 0.23  |
| Potri.014G077200 | POPTR_0014s07320 |           | ARR-B       | 4.12   | 0.68  | 0.94  | 1.09  |
| Potri.014G094200 | POPTR_0014s08990 |           | bZIP        | 24.51  | 11.32 | 12.88 | 16.09 |
| Potri.014G104800 | POPTR_0014s10060 | SND1_B1   | NAC         | 16.63  | 4.01  | 0.21  | 2.14  |
| Potri.014G146200 | POPTR_0014s14320 |           | C2H2        | 83.84  | 14.81 | 46.50 | 45.16 |
| Potri.014G167000 | POPTR_0014s16500 |           | FAR1        | 25.33  | 8.50  | 7.51  | 7.15  |
| Potri.015G033600 | POPTR_0015s05130 | MYB090    | MYB         | 80.10  | 1.68  | 0.52  | 0.39  |
| Potri.015G054500 | POPTR_0015s06470 |           | ERF         | 14.92  | 6.17  | 1.45  | 3.87  |
| Potri.015G082700 | POPTR_0015s09430 | MYB074    | MYB         | 40.20  | 4.02  | 0.38  | 2.13  |
| Potri.015G127400 | POPTR_0015s14770 | VND6-A1   | NAC         | 5.76   | 0.66  | 1.11  | 1.09  |
| Potri.015G129100 | POPTR_0015s14600 | MYB075    | MYB         | 61.29  | 1.62  | 1.41  | 4.49  |
| Potri.016G018600 | POPTR_0016s02010 |           | ERF         | 6.94   | 0.05  | 0.06  | 0.03  |
| Potri.016G054100 | POPTR_0016s05440 |           | NF-YA       | 0.85   | 0.05  | 0.00  | 0.00  |
| Potri.016G056500 | POPTR_0016s05680 |           | HSF         | 49.61  | 1.75  | 1.00  | 4.26  |
| Potri.016G136500 | POPTR_0016s14350 |           | B3          | 45.82  | 4.80  | 4.72  | 4.92  |
| Potri.017G016200 | POPTR_0017s04760 |           | HB-other    | 83.97  | 13.52 | 15.89 | 13.69 |
| Potri.017G016700 | POPTR_0017s04800 | SND2/3-B2 | NAC         | 301.51 | 8.85  | 4.15  | 4.21  |
| Potri.017G091800 | POPTR_0017s12740 |           | C2H2        | 13.07  | 0.56  | 0.88  | 0.52  |
| Potri.017G091900 | POPTR_0017s12750 |           | MYB_related | 38.80  | 19.99 | 22.06 | 24.56 |
| Potri.017G106700 | POPTR_0017s14490 |           | bZIP        | 5.93   | 0.19  | 0.01  | 1.73  |
| Potri.017G119900 | POPTR_0005s15100 |           | C3H         | 124.85 | 5.77  | 1.51  | 1.46  |
| Potri.017G130300 | POPTR_0017s02850 | MYB152    | MYB         | 23.51  | 1.43  | 3.81  | 6.01  |

|                  |                  |            |        |       |       |       |       |
|------------------|------------------|------------|--------|-------|-------|-------|-------|
| Potri.018G063000 | POPTR_0018s07420 |            | ARF    | 16.78 | 5.32  | 6.67  | 4.65  |
| Potri.018G068700 | POPTR_0018s06790 | SND2/3-L-2 | NAC    | 54.13 | 1.82  | 2.68  | 2.41  |
| Potri.018G139300 | POPTR_0018s13600 |            | WRKY   | 43.19 | 20.51 | 22.30 | 12.90 |
| Potri.018G142400 | POPTR_0018s13920 |            | HB-PHD | 7.13  | 2.15  | 2.52  | 2.35  |
| Potri.019G081500 | POPTR_0019s11090 | MYB168     | MYB    | 11.97 | 0.64  | 1.99  | 0.74  |
| Potri.019G085600 | POPTR_0019s11540 |            | GRAS   | 2.13  | 0.12  | 0.21  | 0.19  |
| Potri.019G130000 | POPTR_0019s15040 |            | bZIP   | 29.22 | 13.52 | 11.37 | 14.57 |
| Potri.T074200    |                  |            | NAC    | 40.72 | 18.18 | 9.15  | 9.52  |
